# Supplementary material
Source: PubMed Central journal article supplement (PMC4274773)
Supplement: supp_dc14-1196v141196_DC141196SupplementaryData.pdf [file supp_dc14-1196v141196_DC141196SupplementaryData.pdf]

## SUPPLEMENTARY DATA

**Supplementary Figure 1.** 2D axial plots of trends ( $p < 0.05$ ) detected by ODVBA for group differences between VN RAVENS maps of long and short diabetes duration groups. Subjects with long diabetes duration ( $n=100$ ) had higher RAVENS values, i.e. higher regional ventricular volume, in the highlighted areas, compared to subjects with short diabetes duration ( $n=100$ ). The colormap from red to yellow indicates less to more significance respectively.

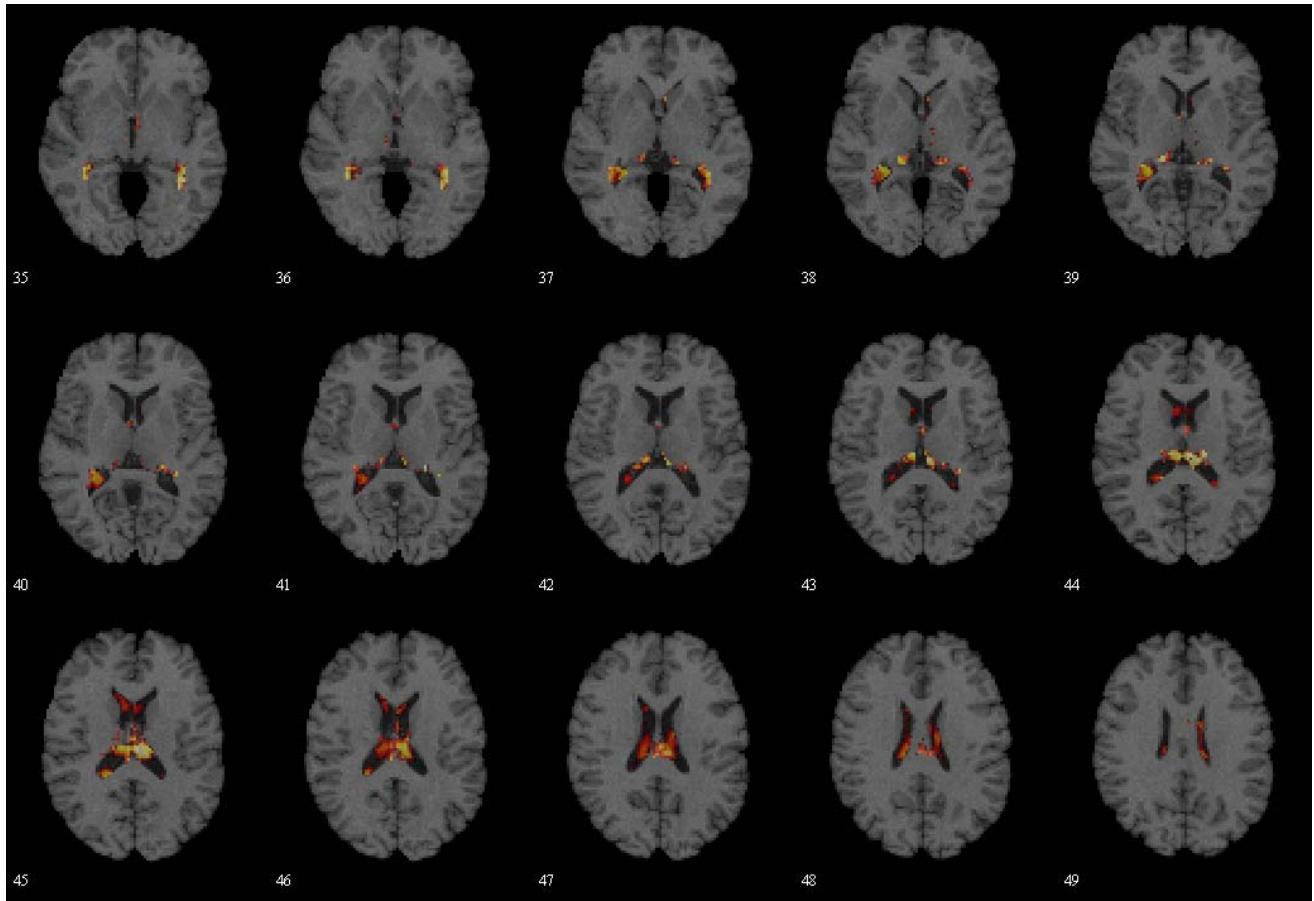

SUPPLEMENTARY DATA

**Supplementary Table 1.** Reasons for missing or excluded scans across treatment groups

| Reason                         | Glycemia Intervention* |                     |
|--------------------------------|------------------------|---------------------|
|                                | Intensive<br>(n=294)   | Standard<br>(n=320) |
| Death before 40 month visit    | 11 (3.7)               | 7 (2.2)             |
| Poor image quality             | 6 (2.0)                | 3 (0.9)             |
| MRI exclusion                  | 8 (2.7)                | 5 (1.6)             |
| Image processing QC exclusion  | 9 (3.0)                | 6 (1.9)             |
| Claustrophobic / very high BMI | 3 (1.0)                | 2 (0.6)             |
| Refused / Withdrew Consent     | 11 (3.7)               | 6 (1.9)             |
| Moved                          | 7 (2.4)                | 5 (1.6)             |
| Unknown                        | 18 (6.1)               | 19 (5.9)            |
| Total                          | 73 (21.8)              | 53 (14.7)           |

\* Data shown are N (percent of total available baseline scans)

SUPPLEMENTARY DATA

**Supplementary Table 2.** Baseline characteristics comparing glycemia arm in sample of 488 MRI participants

|                                               | Overall<br>(N=488)     | Glycemia Arm           |                        | P-value |
|-----------------------------------------------|------------------------|------------------------|------------------------|---------|
|                                               |                        | Standard<br>(N=267)    | Intensive<br>(N=221)   |         |
| Age (years)                                   | 62.2 ± 5.6             | 62.5 ± 5.8             | 61.8 ± 5.5             | 0.2216  |
| Women                                         | 223 (45.7%)            | 126 (47.2%)            | 97 (43.9%)             | 0.4664  |
| Education                                     |                        |                        |                        | 0.9546  |
| Less than high school graduate                | 45 (9.2%)              | 23 (8.6%)              | 22 (10.0%)             |         |
| High school graduate or GED                   | 119 (24.4%)            | 65 (24.3%)             | 54 (24.4%)             |         |
| Some college/technical school                 | 163 (33.4%)            | 89 (33.3%)             | 74 (33.5%)             |         |
| College graduate or more                      | 161 (33.0%)            | 90 (33.7%)             | 71 (32.1%)             |         |
| Clinical Center Network                       |                        |                        |                        | 0.8272  |
| 3-CCN-Minn/Iowa                               | 230 (47.1%)            | 128 (47.9%)            | 102 (46.2%)            |         |
| 4-CCN-Ohio/Mich                               | 68 (13.9%)             | 34 (12.7%)             | 34 (15.4%)             |         |
| 5-CCN-Northeast                               | 64 (13.1%)             | 34 (12.7%)             | 30 (13.6%)             |         |
| 6-CCN-Southeast                               | 126 (25.8%)            | 71 (26.6%)             | 55 (24.9%)             |         |
| Race/Ethnicity                                |                        |                        |                        | 0.9260  |
| White only                                    | 331 (67.8%)            | 185 (69.3%)            | 146 (66.1%)            |         |
| Spanish/Hispanic                              | 31 (6.4%)              | 16 (6.0%)              | 15 (6.8%)              |         |
| Black, non Hispanic                           | 84 (17.2%)             | 44 (16.5%)             | 40 (18.1%)             |         |
| Asian, not Hispanic or Black                  | 7 (1.4%)               | 3 (1.1%)               | 4 (1.8%)               |         |
| Other                                         | 35 (7.2%)              | 19 (7.1%)              | 16 (7.2%)              |         |
| Smoking Status                                |                        |                        |                        | 0.4347  |
| Never                                         | 226 (46.4%)            | 117 (43.8%)            | 109 (49.5%)            |         |
| Former                                        | 200 (41.1%)            | 114 (42.7%)            | 86 (39.1%)             |         |
| Current                                       | 61 (12.5%)             | 36 (13.5%)             | 25 (11.4%)             |         |
| Systolic Blood Pressure (mm Hg)               | 134.6 ± 17.8           | 135.7 ± 19.0           | 133.3 ± 16.3           | 0.1375  |
| Diastolic Blood Pressure (mm Hg)              | 74.7 ± 10.2            | 74.7 ± 10.6            | 74.7 ± 9.7             | 0.9962  |
| Diabetes Duration (years)                     | 10.0 ± 7.1             | 10.4 ± 7.5             | 9.6 ± 6.5              | 0.1880  |
| HbA1c (% , mmol/mol)                          | 8.1 ± 0.9<br>(65 ± 10) | 8.1 ± 0.9<br>(65 ± 10) | 8.2 ± 1.0<br>(66 ± 11) | 0.3359  |
| Total Cholesterol (mg/dL)                     | 181.6 ± 40.4           | 182.7 ± 45.1           | 180.3 ± 33.8           | 0.5182  |
| Low-density lipoprotein (mg/dL)               | 101.1 ± 32.2           | 102.7 ± 35.4           | 99.1 ± 27.9            | 0.2225  |
| High-density lipoprotein in Women (mg/dL)     | 48.7 ± 12.4            | 48.4 ± 12.4            | 49.1 ± 12.4            | 0.6878  |
| High-density lipoprotein in Men (mg/dL)       | 40.0 ± 10.3            | 40.4 ± 9.3             | 39.4 ± 11.4            | 0.4321  |
| BMI                                           | 32.5 ± 5.1             | 32.0 ± 4.9             | 33.0 ± 5.3             | 0.0362  |
| History of cardiovascular disease             | 124 (25.4%)            | 67 (25.1%)             | 57 (25.8%)             | 0.8600  |
| Total Brain Volume                            | 925.5 ± 96.2           | 925.4 ± 92.4           | 925.6 ± 100.8          | 0.9762  |
| Depression (patient health questionnaire >10) | 57 (11.7%)             | 29 (10.9%)             | 28 (12.7%)             | 0.5359  |
| Baseline DSST                                 | 54.6 ± 15.6            | 55.1 ± 15.8            | 54.0 ± 15.3            | 0.4054  |
| Baseline RAVLT                                | 7.6 ± 2.5              | 7.6 ± 2.5              | 7.6 ± 2.4              | 0.9479  |
| Baseline STROOP                               | 30.5 ± 15.6            | 29.9 ± 14.0            | 31.2 ± 17.3            | 0.3756  |
| Baseline MMSE                                 | 27.7 ± 2.3             | 27.7 ± 2.4             | 27.6 ± 2.3             | 0.8395  |
